# Supplementary material for: HPV-16 E6/E7 DNA tattoo vaccination using genetically optimized vaccines elicit clinical and immunological responses in patients with usual vulvar intraepithelial neoplasia (uVIN): a phase I/II clinical trial
Source: PubMed Central journal article supplement — J Immunother Cancer. 2021 Aug 2;9(8):e002547. doi: 10.1136/jitc-2021-002547 (PMC8330588; doi:10.1136/jitc-2021-002547), 2021-08-02
Supplement: jitc-2021-002547supp001.pdf [file jitc-2021-002547supp001.pdf]

# Supplementary figures

**Supplementary figure 1:** Gating strategy example of phenotypic characterization and cytokine production of CD4 and CD8 T cells.

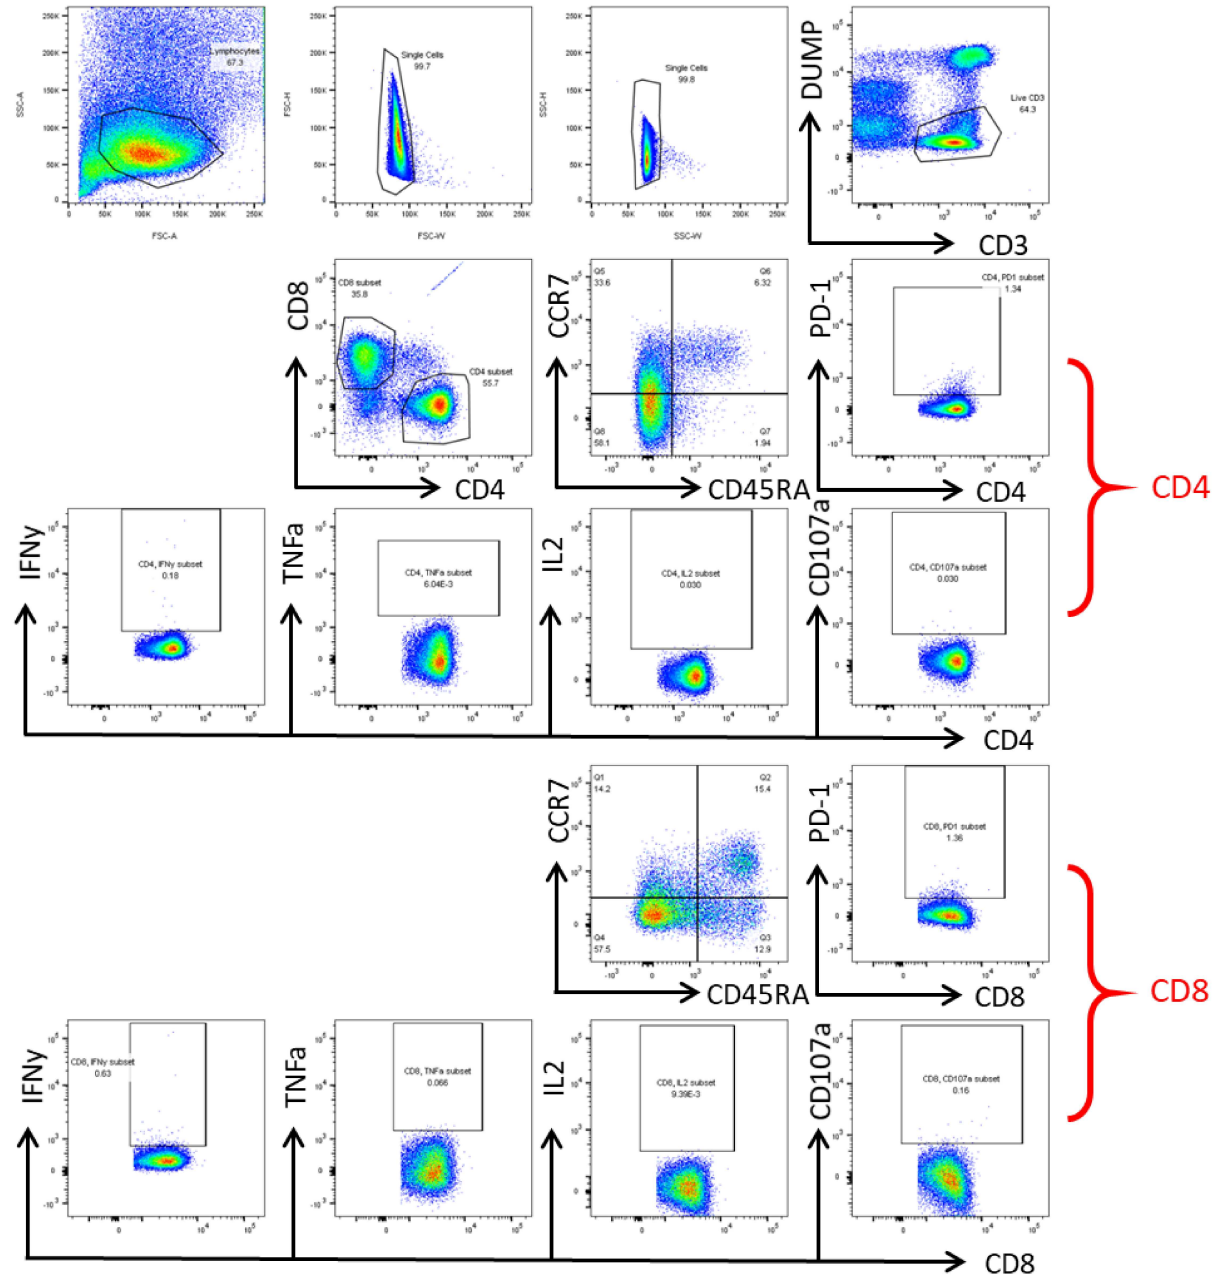

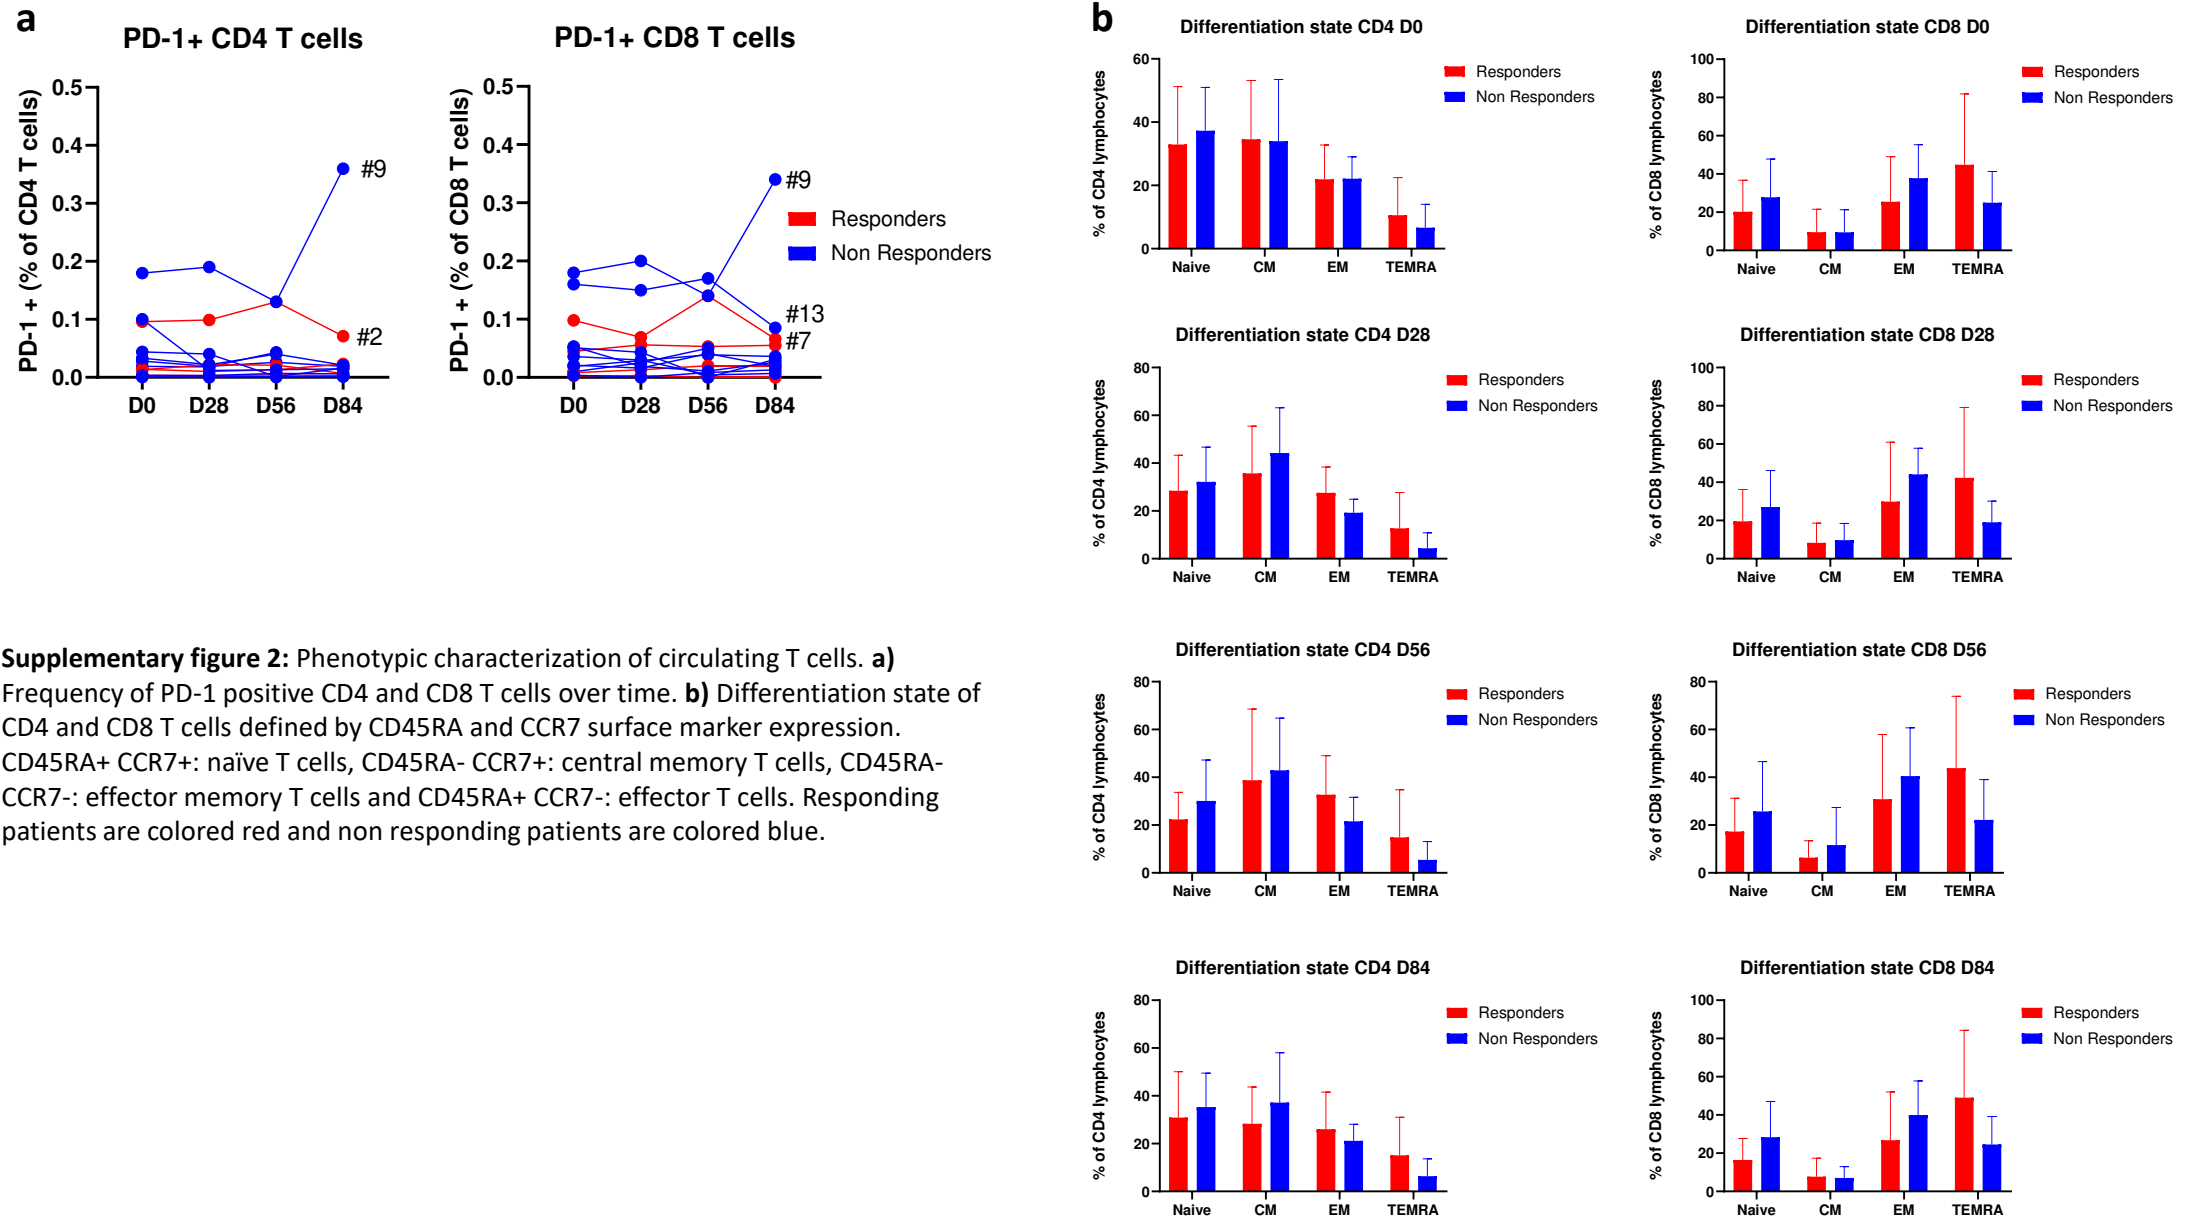

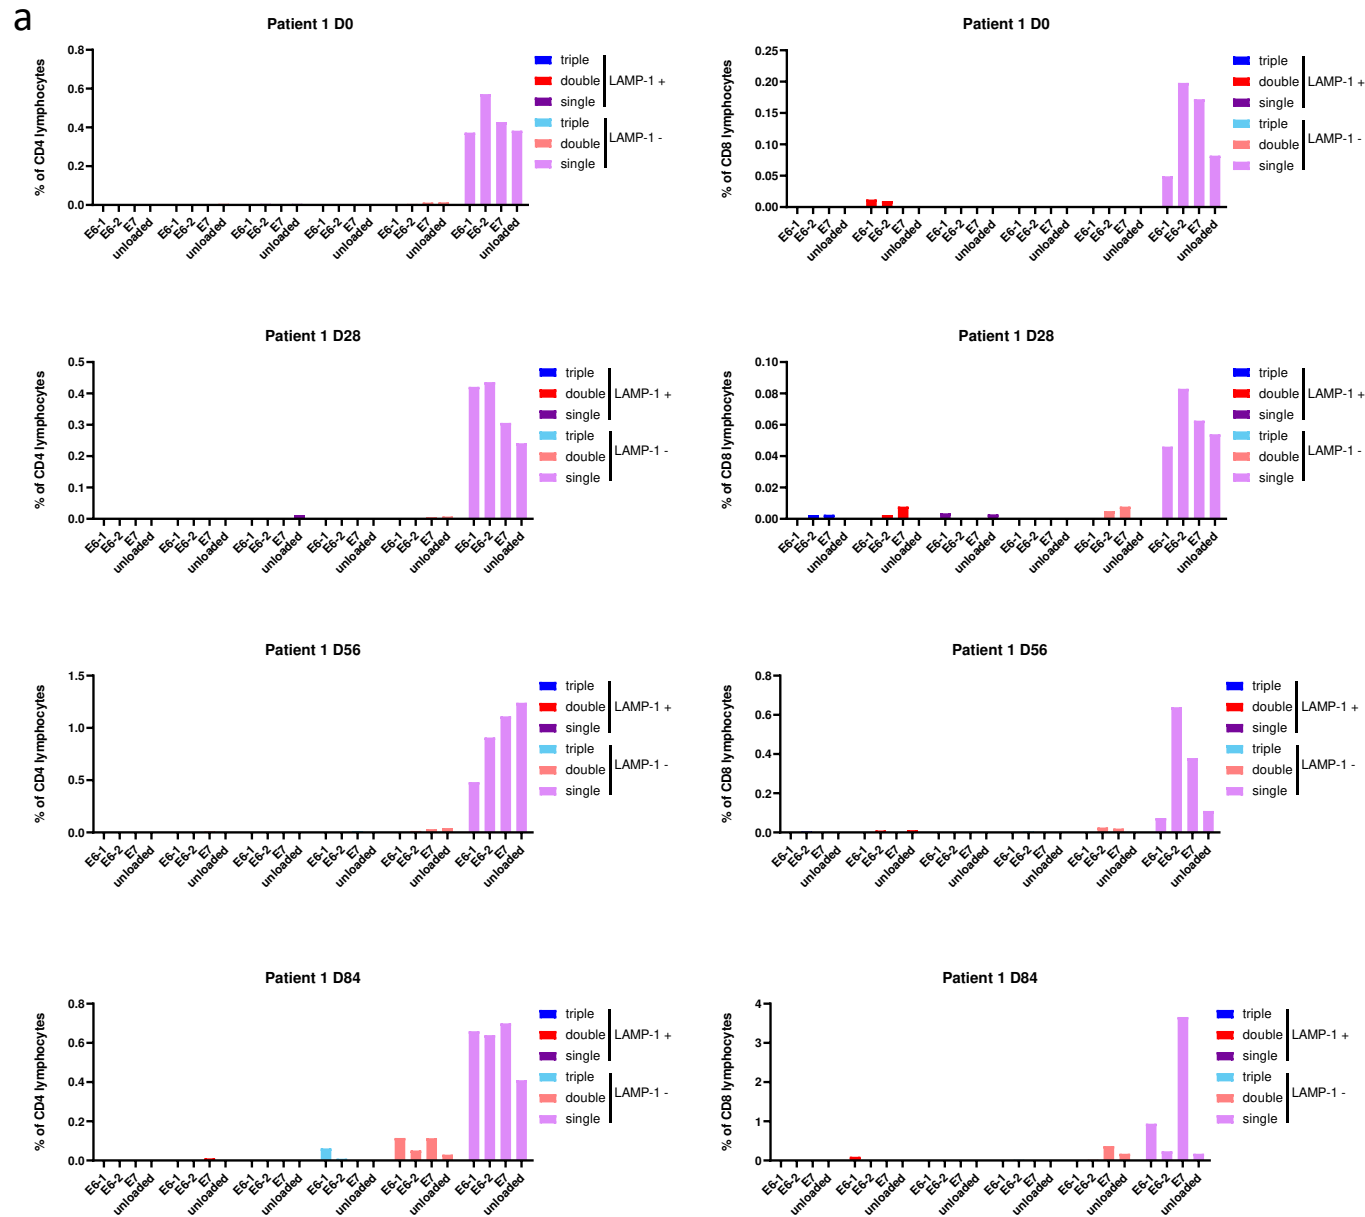

**Supplementary figure 3:** Depicted are the frequencies of single, double and triple cytokine producing CD4 and CD8 T cells, with and without co-expression of degranulation marker CD107a (LAMP-1), determined using Boolean gating. Depicted are immunologically responding patients **a** patient 1, **b** patient 2, **c** patient 4, **d** patient 7 and **e** patient 8.

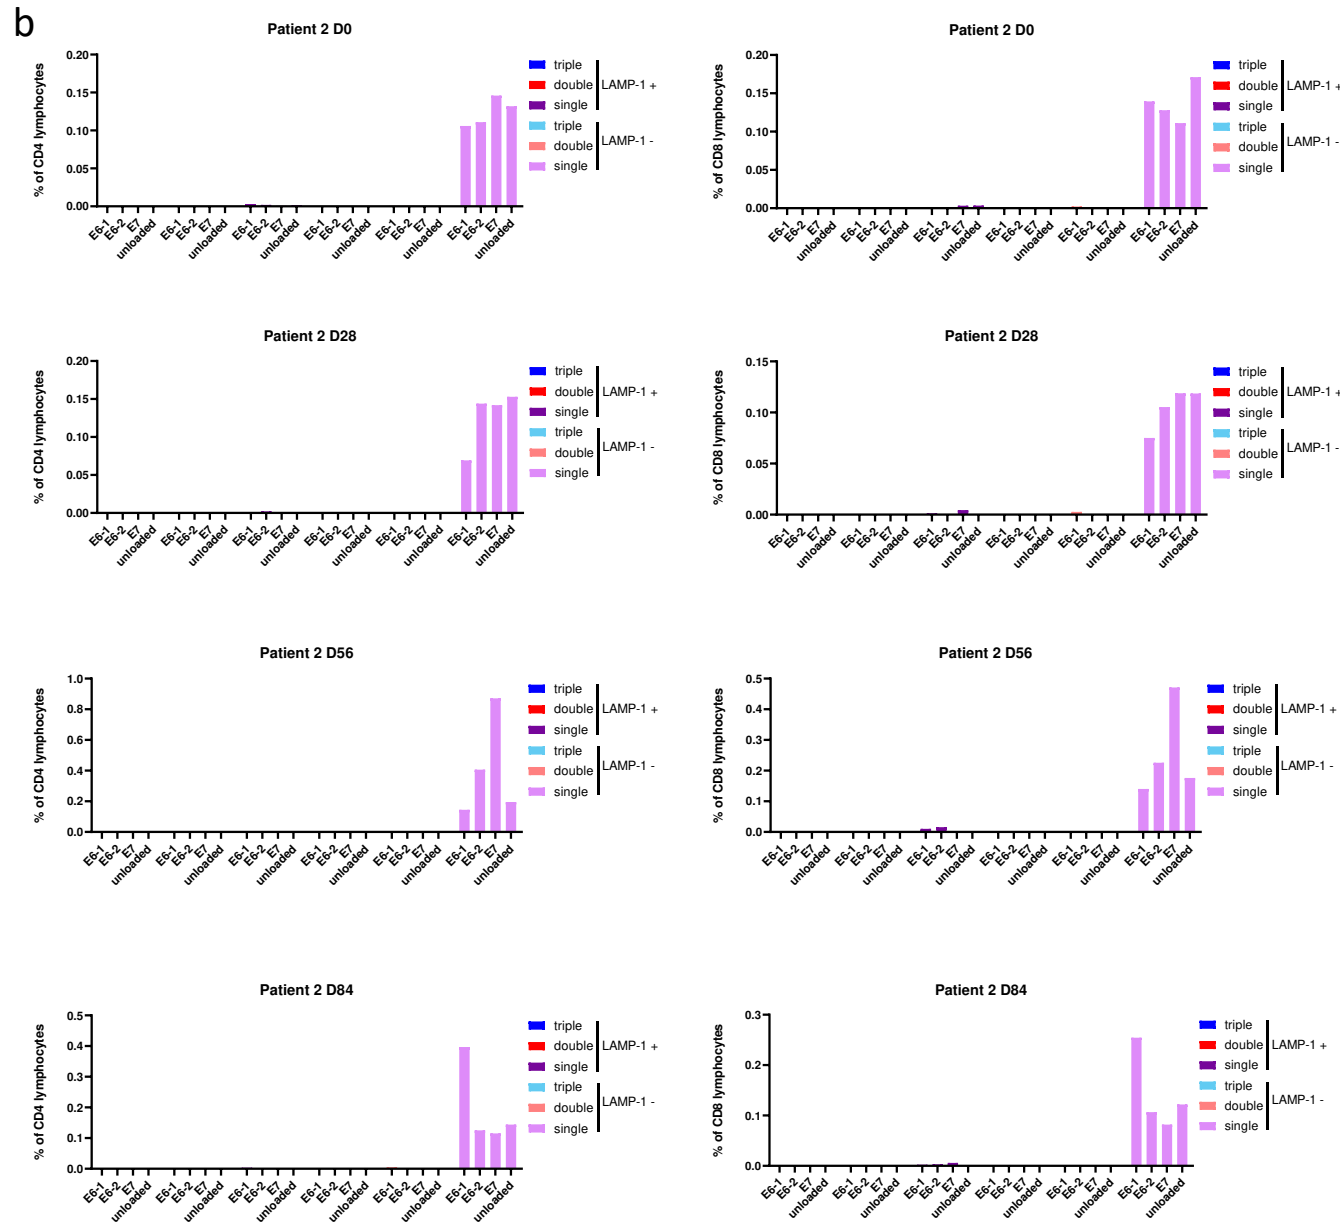





e

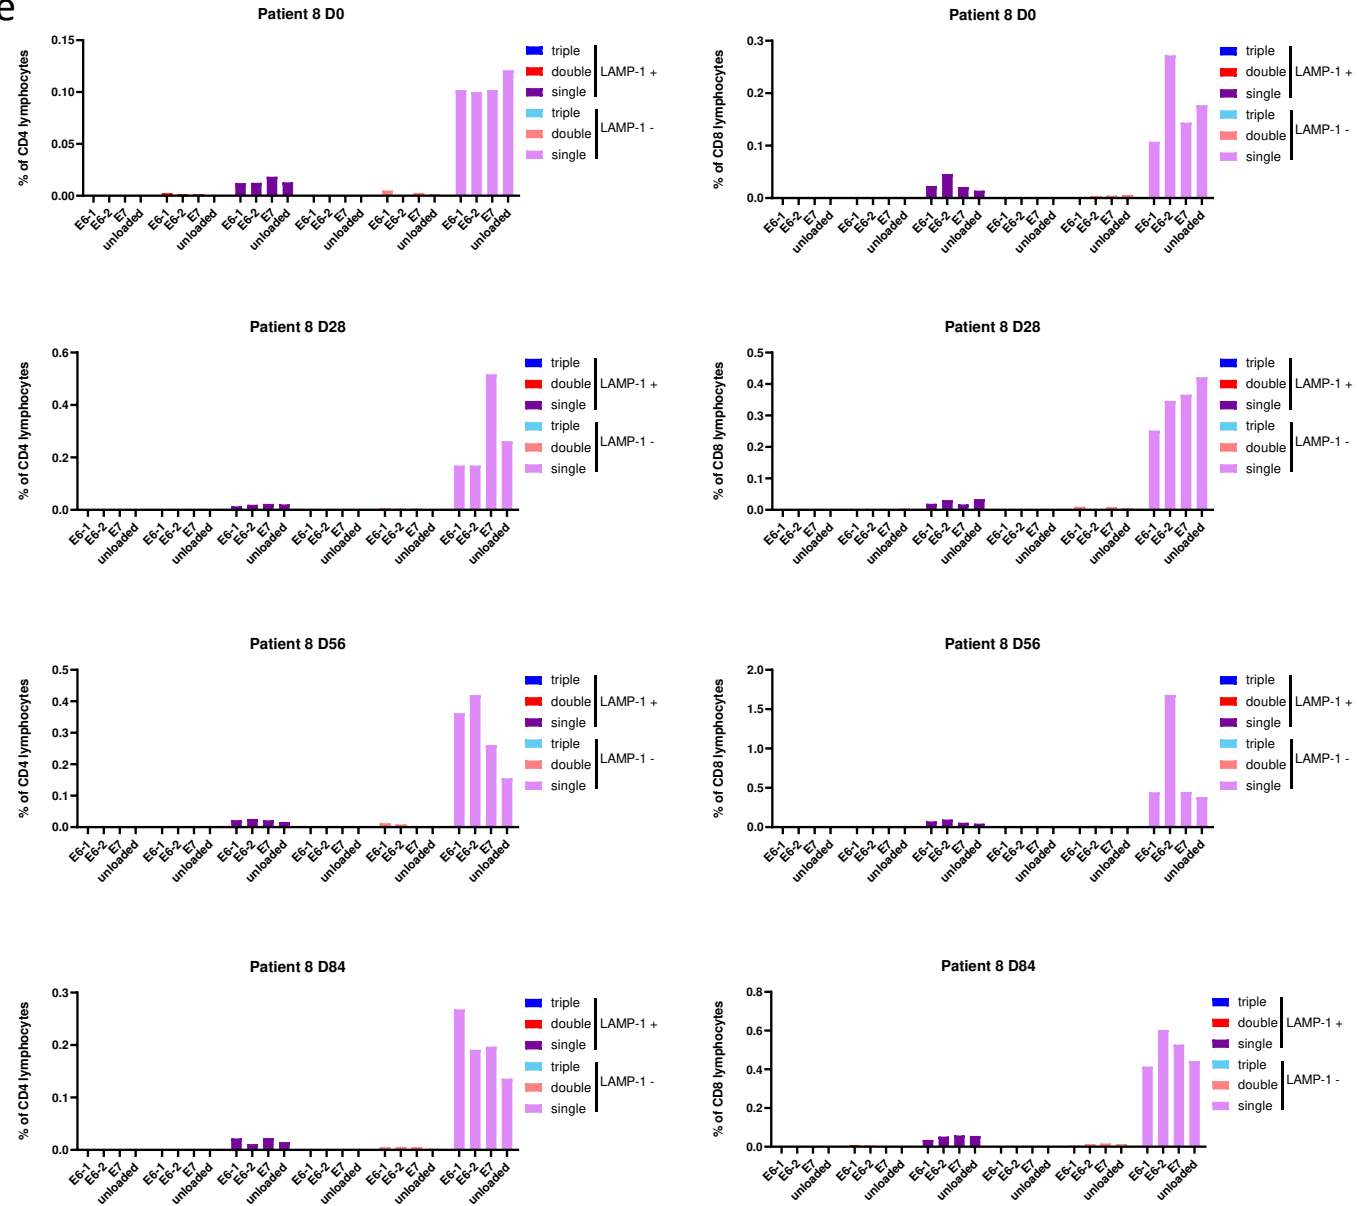



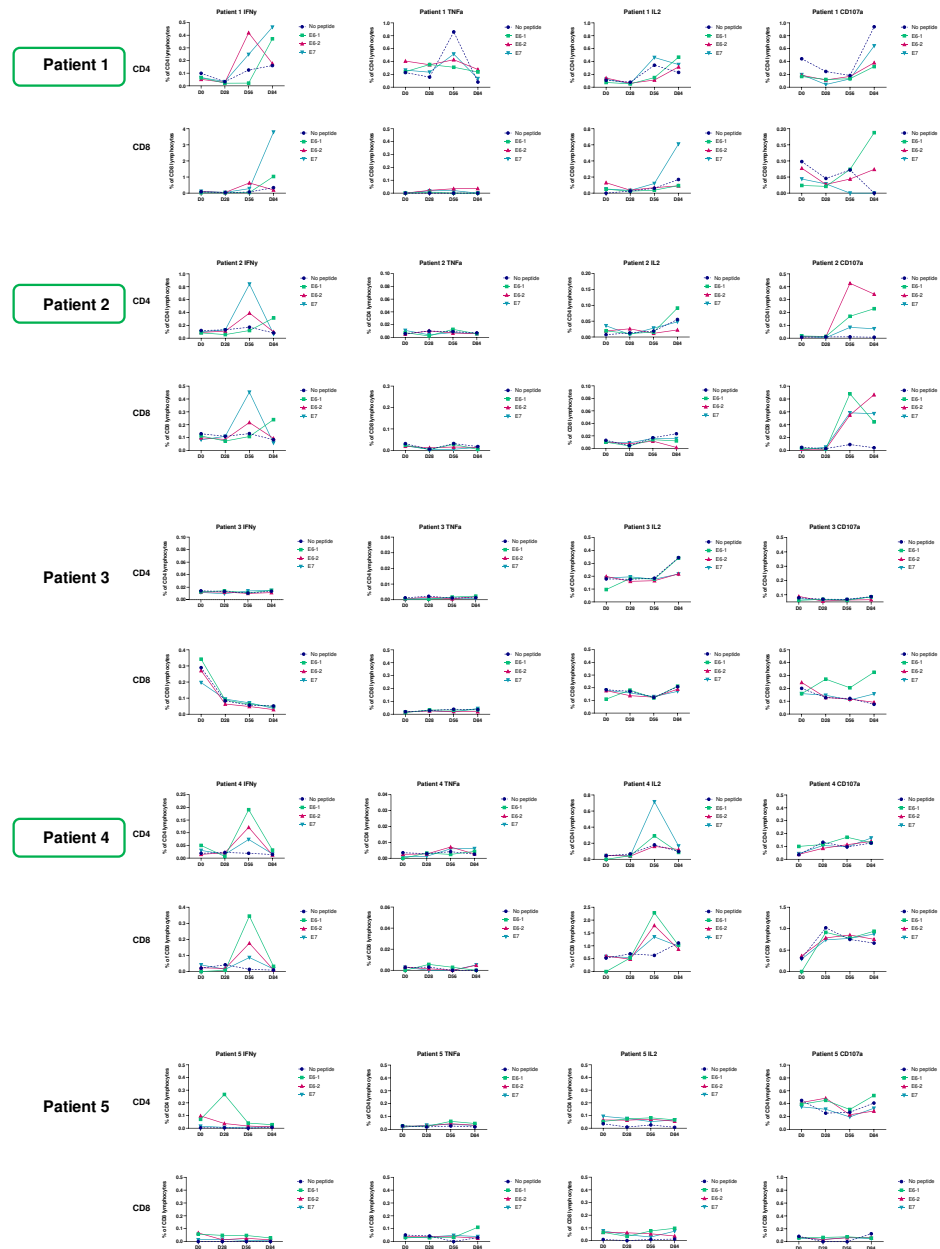

**Supplementary figure 4:** Time course graphs showing the IFN $\gamma$ , TNF $\alpha$ , IL-2 and CD107a responses against E6-1, E6-2 and E7 peptide pool for each patient. No peptides indicate that T cells were co-cultured with unloaded APCs to access background or aspecific reactivity. The green boxes highlight the patients with an immunological response.

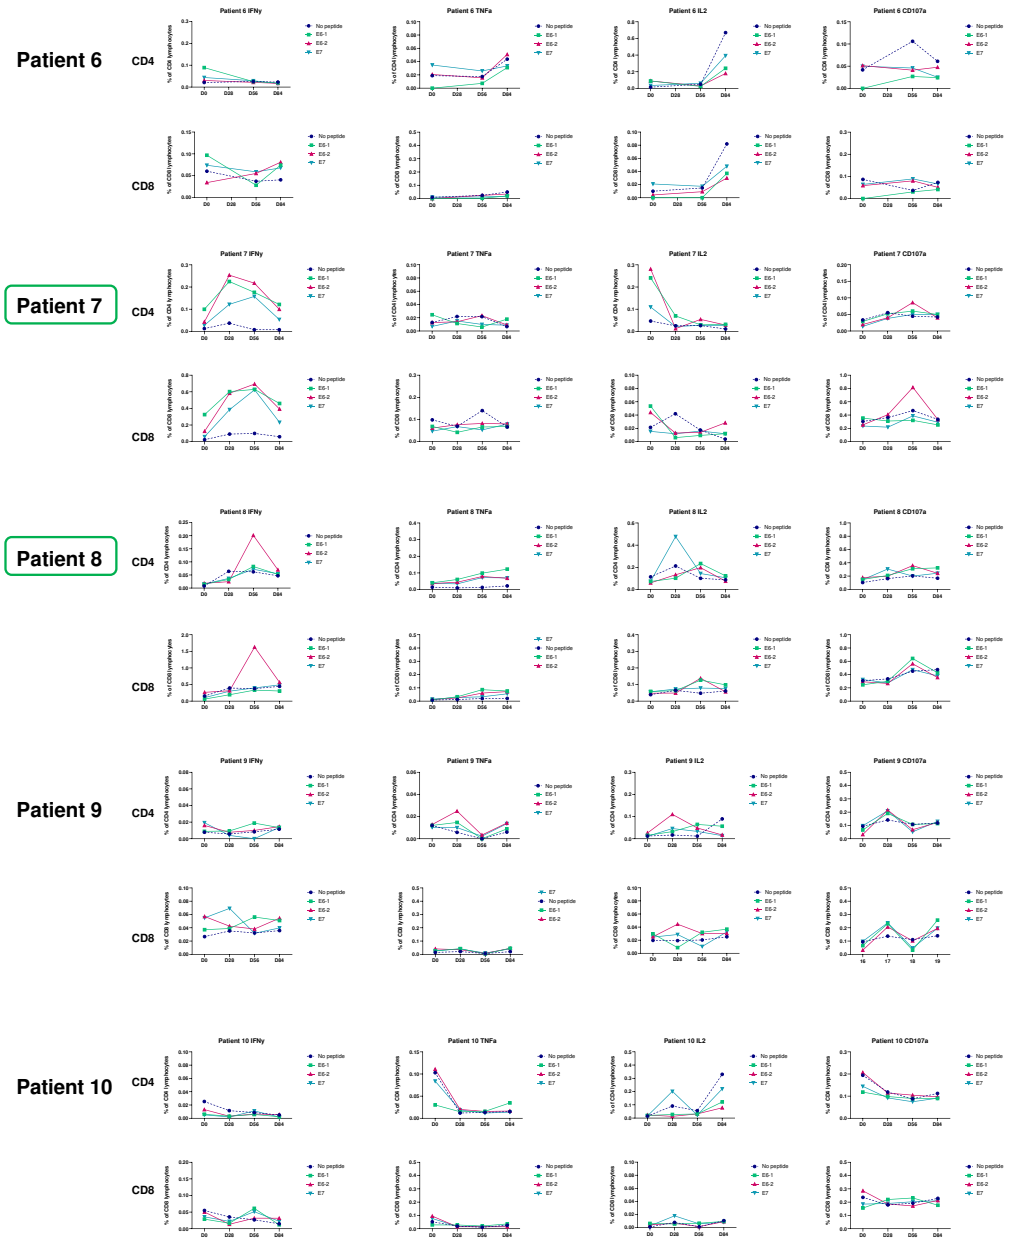

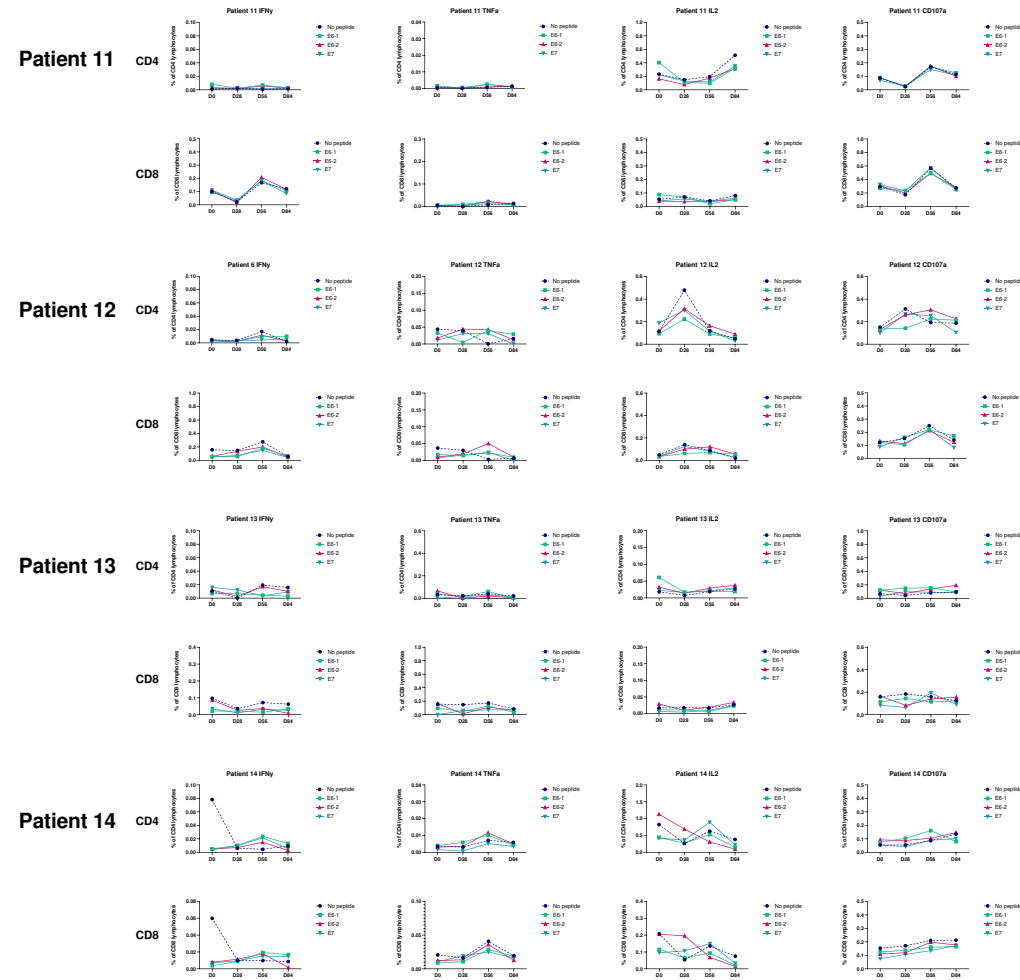

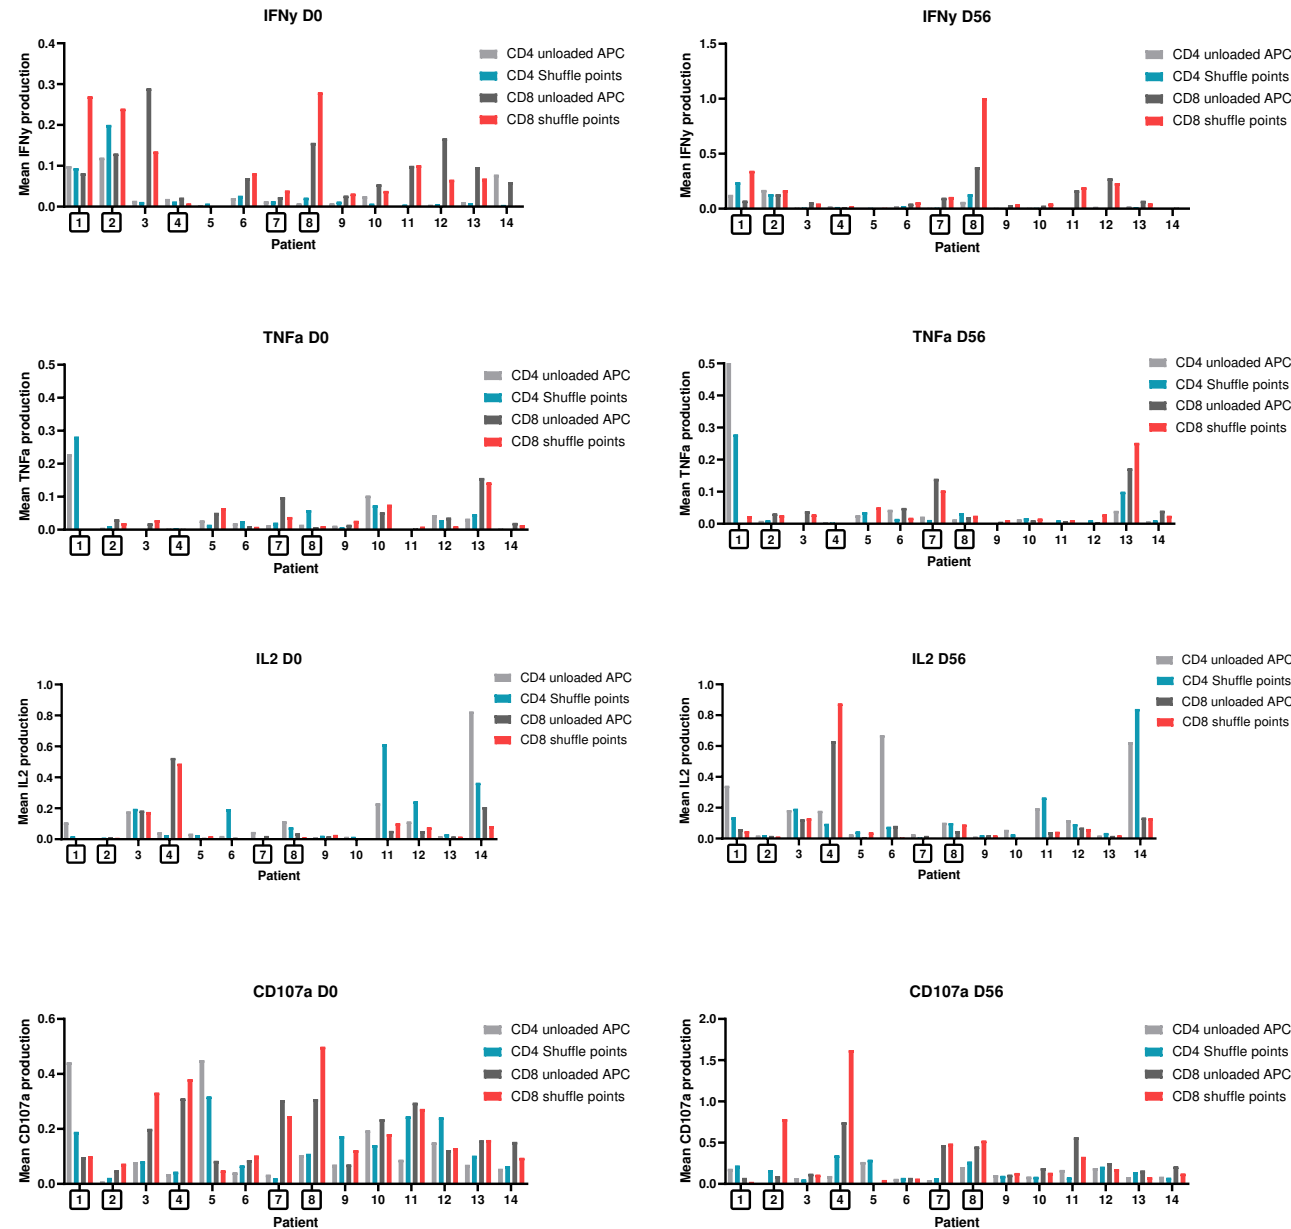

**Supplementary figure 5:** Reactivity against the peptides that arose as a consequence of shuffling the E6 and E7 coding sequences. Boxes highlight responding patients.

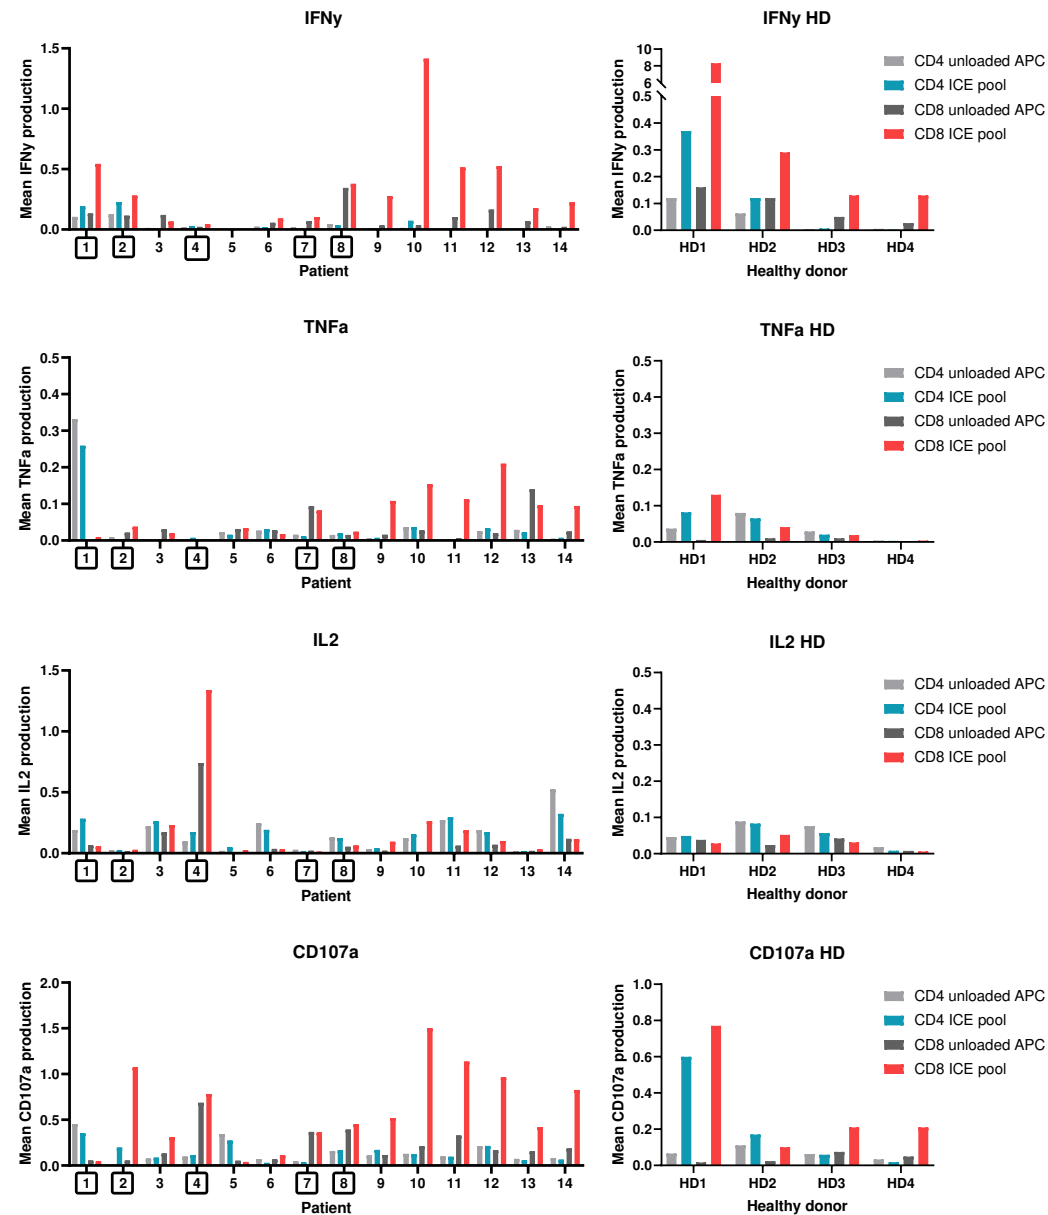

**Supplementary figure 6:** Reactivity against ICE peptide pool at day 0. On the left, patient responses are depicted and on the right four healthy controls are depicted for the matched cytokines or LAMP-1. The black boxes on the x-axis highlight responding patients.
