# Supplementary material for: HPV-16 E6/E7 DNA tattoo vaccination using genetically optimized vaccines elicit clinical and immunological responses in patients with usual vulvar intraepithelial neoplasia (uVIN): a phase I/II clinical trial
Source: PubMed Central journal article supplement — J Immunother Cancer. 2021 Aug 2;9(8):e002547. doi: 10.1136/jitc-2021-002547 (PMC8330588; doi:10.1136/jitc-2021-002547), 2021-08-02
Supplement: jitc-2021-002547supp002.pdf [file jitc-2021-002547supp002.pdf]

| Peptide Pool | Peptide Number | Amino Acid Sequence     |
|--------------|----------------|-------------------------|
| Pool 1: E6-1 | 1              | MHQKRTAMFQDPQERPRKLPQL  |
|              | 2              | DPQERPRKLPQLCTELQTTIHD  |
|              | 3              | QLCTELQTTIHDIIILECVYCKQ |
|              | 4              | HDIILECVYCKQQLLRREYDF   |
|              | 5              | KQQLRREYDFAFRDLICIVYR   |
|              | 6              | DFAFRDLICIVYRDGNPYAVCDK |
|              | 7              | YRDGNPYAVCDKCLKFYKISE   |
|              | 8              | DKCLKFYKISEYRHYCYSLYG   |
| Pool 2: E6-2 | 9              | SEYRHYCYSLYGTTLEQQYNKP  |
|              | 10             | YGTTLEQQYNKPLCDLLIRCIN  |
|              | 11             | KPLCDLLIRCINCQKPLCPEEK  |
|              | 12             | INCQKPLCPEEKQRHLDKKQRF  |
|              | 13             | EKQRHLDKKQRFHNIIRGRWTGR |
|              | 14             | RFHNIIRGRWTGRCMSSCRSRT  |
|              | 15             | GRWTGRCMSSCRSRTRETQL    |
| Pool 3: E7   | 16             | MHGDTPTLHEYMLDLQPETDL   |
|              | 17             | YMLDLQPETDLICYEQLNDSS   |
|              | 18             | DLYCYEQLNDSSEEEDEIDGPA  |
|              | 19             | SSEEEDEIDGPAGQAEPDRAHY  |
|              | 20             | PAGQAEPDRAHYNIVTFCKCD   |
|              | 21             | HYNIVTFCKCDSTLRLCVQST   |
|              | 22             | CDSTLRLCVQSTHVDIRTLEDL  |
|              | 23             | STHVDIRTLEDLLMGTGLGIVCP |

|                                                                                                    |    |                        |
|----------------------------------------------------------------------------------------------------|----|------------------------|
|                                                                                                    | 24 | RTLEDLLMGTLGIVCPICSQKP |
| Pool 4: Potential epitopes that may have arisen as a consequence of shuffling the protein domains. | 25 | TDLYCICSQKPKCDSTLRL    |
|                                                                                                    | 26 | GTLGIVCPYEQLNDSS       |
|                                                                                                    | 27 | YNIVTFCCQPETTDLY       |
|                                                                                                    | 28 | HDIILECVNCQKPLCP       |
|                                                                                                    | 29 | GRWTGRCMKCLKFYSK       |
|                                                                                                    | 30 | CDLLIRCIYCKQQLLR       |
|                                                                                                    | 31 | GNPYAVCDSCCRSSRT       |
|                                                                                                    | 32 | RTRRETQLQLCTELQT       |

**Supplementary table 1:** Overview of peptide pools used in the ex vivo reactivity screens, and the amino acid sequence of each peptide.

| Target + Fluorochrome                      | Clone                           | Details     | Vendor         |
|--------------------------------------------|---------------------------------|-------------|----------------|
| CD3-APC-H7                                 | Clone SK7                       | Mouse IgG1  | BD Biosciences |
| CD14-Pacific Blue                          | Clone TùK4                      | Mouse IgG2a | Invitrogen     |
| CD16-Pacific Blue                          | Clone 3G8                       | Mouse IgG1  | Invitrogen     |
| CD19-Pacific Blue                          | Clone SJ25-C1                   | Mouse IgG1  | Invitrogen     |
| CD4-PE                                     | Clone S3.5                      | Mouse IgG2a | Invitrogen     |
| CD8-PerCP-Cy5.5                            | Clone SK1                       | Mouse IgG1  | BioLegend      |
| CCR7-PE-CF594                              | Clone 150503                    | Mouse IgG2a | BD Biosciences |
| CD45RA-PE-Cy5.5                            | Clone MEM-56                    | Mouse IgG2b | Invitrogen     |
| PD-1-eVolve 655                            | Clone J105                      | Mouse IgG1  | eBiosciences   |
| IFN $\gamma$ -FITC                         | Clone B27                       | Mouse IgG1  | BD Biosciences |
| IL-2-APC                                   | Clone MQ1-17H12                 | Rat IgG2a   | BD Biosciences |
| TNF $\alpha$ -PE-Cy7                       | Clone MAb11                     | Mouse IgG1  | BD Biosciences |
| CD107a-Alexa Fluor 700                     | Clone H4A3                      | Mouse IgG1  | BD Biosciences |
| Fixable Violet Dead Cell Stain Kit, 405 nm | Fluorescent reactive dye + DMSO |             | Invitrogen     |

**Supplementary table 2:** Antibody panel used for ex vivo reactivity screens.

**SUPPLEMENTARY FIGURE LEGENDS**

**Supplementary figure 1:** Gating strategy example of phenotypic characterization and cytokine production of CD4 and CD8 T cells.

**Supplementary figure 2:** Phenotypic characterization of circulating T cells. **a)** Frequency of PD-1 positive CD4 and CD8 T cells over time. **b)** Differentiation state of CD4 and CD8 T cells defined by CD45RA and CCR7 surface marker expression. CD45RA+ CCR7+: naïve T cells, CD45RA- CCR7+: central memory T cells, CD45RA- CCR7-: effector memory T cells and CD45RA+ CCR7-: effector T cells. Responding patients are colored red and non-responding patients are colored blue.

**Supplementary figure 3:** Depicted are the frequencies of single, double and triple cytokine producing CD4 and CD8 T cells, with and without co-expression of degranulation marker CD107a (LAMP-1), determined using Boolean gating. Depicted are immunologically responding patients **a** patient 1, **b** patient 2, **c** patient 4, **d** patient 7 and **e** patient 8.

**Supplementary figure 4:** Time course graphs showing the IFN $\gamma$ , TNF $\alpha$ , IL-2 and CD107a responses against E6-1, E6-2 and E7 peptide pool for each patient. No peptides indicate that T cells were co-cultured with unloaded APCs to assess background or aspecific reactivity. The green boxes highlight the patients with an immunological response.

**Supplementary figure 5:** Reactivity against the peptides that arose as a consequence of shuffling the E6 and E7 coding sequences. Boxes highlight responding patients.

**Supplementary figure 6:** Reactivity against ICE peptide pool at day 0. On the left, patient responses are depicted and on the right four healthy controls are depicted for the matched cytokines or LAMP-1. The black boxes on the x-axis highlight responding patients.
